# Supplementary material for: Recruitment of toxin-like proteins with ancestral venom function supports endoparasitic lifestyles of Myxozoa
Source: PubMed Central journal article supplement (PMC8083181; doi:10.7717/peerj.11208), 2021-04-26

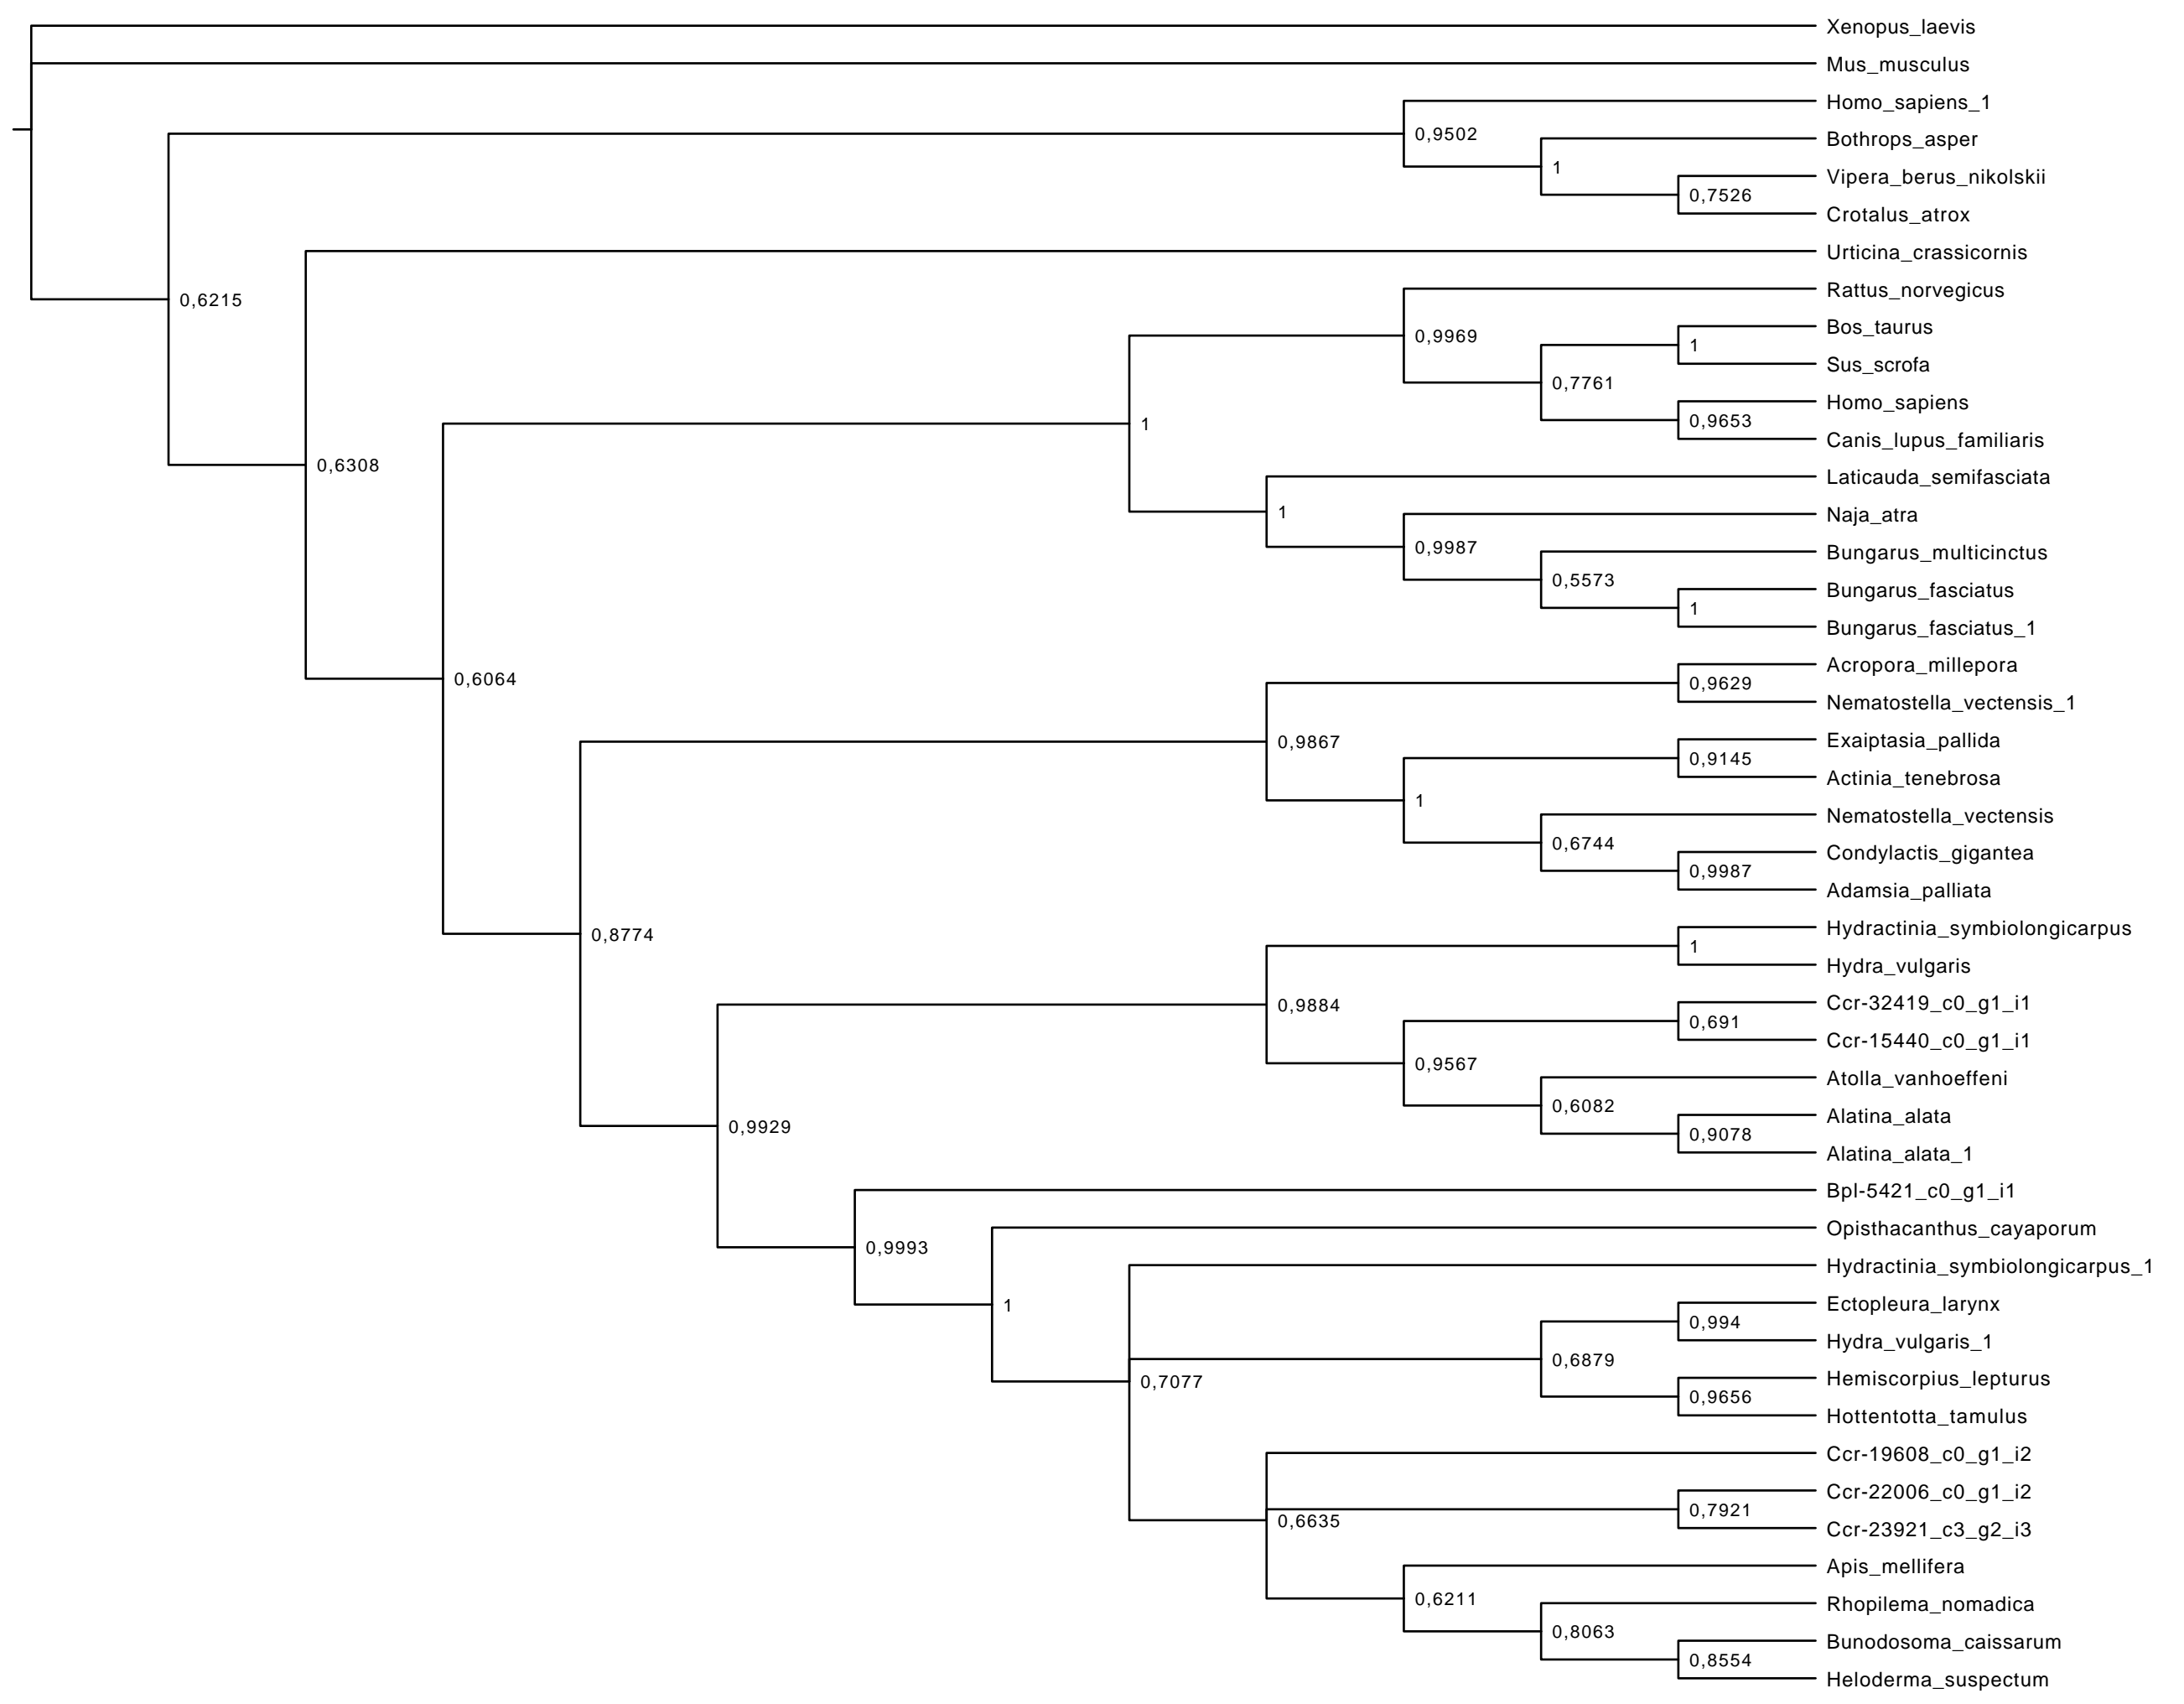

Supplement: peerj-09-11208-s010.pdf [file peerj-09-11208-s010.pdf]
