# Supplementary material for: Recruitment of toxin-like proteins with ancestral venom function supports endoparasitic lifestyles of Myxozoa
Source: PeerJ. 2021 Apr 26;9:e11208. doi: 10.7717/peerj.11208 (PMC8083181; doi:10.7717/peerj.11208)
Supplement: Supplemental Information 17 [file peerj-09-11208-s017.xlsx]

## Sheet: Sheet1
ELISA test for rabbit polyclonals (Biogenes phase 2) 31-8-19
	Ve-1	peptide (immunogen) + pre-immunised sera
	Ve-2	mixture on non-related peptide (immunogens) + test sera
	Ve-3	corresponding peptide (immunogen) + no secondary antibody
	Ve+	peptide (immunogen) + test sera
																	Peptide mixture
																	PO35	RTALQDADGRACRSR
	INHIBITOR-PB parasite									LECTIN-PB parasite							PO36	FVRSKPRGFWASLKQ
	PO17			PO18			PO19			PO20			PO21				P037	YNDSITTATSGFGF
Serial dilution of sera (antibody titre)	Ve+	Ve-1	Ve-2	Ve+	Ve-1	Ve-2	Ve+	Ve-1	Ve-2	Ve+	Ve-1	Ve-2	Ve+	Ve-1	Ve-2		PO38	KGDPNNPAGFLDW
1/50	2.2078	0.155	0.1542	3.2664	0.2038	0.1495	1.0667	0.1444	0.1367	2.7126	0.134	0.2071	3.1827	0.131	0.1295		PO39	FLSPSQKPQVR
1/100	1.9834	0.1292	0.0898	2.9486	0.15	0.0949	0.5605	0.1062	0.1466	1.8513	0.0778	0.1716	2.8536	0.0995	0.1101		PO40	QGKGKPPRVGR
1/250	1.3951	0.0829	0.0729	2.4564	0.1282	0.0755	0.2054	0.0928	0.1063	1.172	0.0663	0.0875	2.4107	0.0757	0.0982		PO43	RFEENLAAVATADDP
1/500	0.8375	0.1361	0.0681	1.7648	0.109	0.085	0.1445	0.1023	0.1166	0.7279	0.079	0.088	2.0576	0.0644	0.0953		PO44	LSDVRELAADESYSR
1/1000	0.5916	0.099	0.0724	1.2023	0.0981	0.0629	0.1535	0.0928	0.0866	0.4356	0.065	0.0786	1.5411	0.0728	0.0753		PO45	RDAEEIIYSDVKILP
1/4000	0.2457	0.113	0.0653	0.4589	0.113	0.0588	0.104	0.0907	0.1025	0.1434	0.0781	0.0789	0.7485	0.0825	0.0781		PO46	RTNRDSDASDYEYIDP
1/16000	0.188	0.1318	0.0759	0.2099	0.1044	0.0684	0.1314	0.0968	0.1093	0.1037	0.1142	0.0783	0.2334	0.1433	0.0827		PO47	RDSDASNYQDFDPR
Ve-3	0.0614	0.1	0.0732	0.0943	0.1118	0.0629	0.1445	0.0952	0.102	0.0972	0.071	0.0664	0.0766	0.0599	0.0817		PO48	AFVPGENSKSPYVW
																	PO49	FLVESEVDARPQHS
	Alle-1 PR parasite
	PO15			PO16
	Ve+	Ve-1	Ve-2	Ve+	Ve-1	Ve-2
1/50	2.973	0.242	0.2252	0.7379	0.1364	0.1651
1/100	2.8788	0.2372	0.2935	0.4708	0.1455	0.0627
1/250	2.7234	0.1632	0.1455	0.1887	0.1501	0.1859
1/500	2.7054	0.2354	0.1343	0.1774	0.1019	0.072
1/1000	2.84	0.1987	0.1463	0.1315	0.1111	0.07
1/4000	2.6689	0.1969	0.2352	0.1288	0.1243	0.073
1/16000	2.0099	0.1074	0.1694	0.1192	0.089	0.0849
Ve-3	0.1044	0.0913	0.1414	0.072	0.0826	0.075
Washing buffer: PBST 1XPBS + 0.1% Tween-20, 200 ulx3
2nd Ab: goat anti-rabbit IgG AP conjugated affinity purified diluted in 1% milk-PBST 1:3000, 50 ul for 1 hr
