# Supplementary material for: Recruitment of toxin-like proteins with ancestral venom function supports endoparasitic lifestyles of Myxozoa
Source: PeerJ. 2021 Apr 26;9:e11208. doi: 10.7717/peerj.11208 (PMC8083181; doi:10.7717/peerj.11208)
Supplement: Supplemental Information 19 [file peerj-09-11208-s019.xlsx]

## Sheet: B. plumatellae
Toxin Group		Transcript Header	Annotation from custom ToxDB	Species with closest homology	Accession/Sequence ID
Aspartic peptidase	4	Bpl-13315_c0_g2_i2	Aspartyl protease	Chrysaora fuscescens	comp12883_c0_seq1
		Bpl-13315_c0_g6_i1	Aspartyl protease	Chrysaora fuscescens	comp12883_c0_seq1
		Bpl-375_c0_g1_i1	Aspartyl protease	Chrysaora fuscescens	comp12883_c0_seq1
		Bpl-6070_c0_g1_i1	Aspartyl protease	Chrysaora fuscescens	comp13494_c0_seq1
CRiSP	7	Bpl-10897_c0_g1_i1	Venom allergen	Chrysaora fuscescens	comp13672_c0_seq1
		Bpl-10897_c0_g2_i2	Venom allergen	Chrysaora fuscescens	comp13672_c0_seq1
		Bpl-10952_c0_g1_i1	Venom allergen	Chrysaora fuscescens	comp13672_c0_seq1
		Bpl-10952_c0_g1_i3	Venom allergen	Chrysaora fuscescens	comp13342_c1_seq2
		Bpl-11694_c0_g1_i4	Venom allergen	Chrysaora fuscescens	comp13672_c0_seq1
		Bpl-11694_c0_g1_i1	Venom allergen	Chrysaora fuscescens	comp13672_c0_seq1
		Bpl-5496_c0_g1_i1	Venom allergen	Chrysaora fuscescens	comp13342_c1_seq2
C-type Lectin	9	Bpl-13616_c0_g3_i2	C-type lectin	Chrysaora fuscescens	comp13792_c0_seq2
		Bpl-13616_c0_g3_i3	C-type lectin	Chrysaora fuscescens	comp13792_c0_seq2
		Bpl-13616_c0_g3_i4	C-type lectin	Chrysaora fuscescens	comp13792_c0_seq2
		Bpl-13616_c0_g3_i6	C-type lectin	Chrysaora fuscescens	comp13792_c0_seq2
		Bpl-13734_c0_g1_i2	Snaclec 7	Acropora digitifera	adi_v1.12298
		Bpl-13734_c0_g2_i5	Snaclec 7	Acropora digitifera	adi_v1.12298
		Bpl-13734_c0_g2_i8	Snaclec 7	Acropora digitifera	adi_v1.12298
		Bpl-4058_c0_g1_i1	C-type lectin 1	Hydrophis hardwickii	A3FM55
		Bpl-8304_c0_g1_i1	C-type lectin mannose-binding isoform	Oxyuranus scutellatus	D2YVH7
Glutaminyl-peptide cyclotransferase	2	Bpl-11333_c0_g1_i2	Glutaminyl-peptide cyclotransferase	Gloydius blomhoffii	Q90YA8
		Bpl-11333_c0_g1_i8	Glutaminyl-peptide cyclotransferase	Bothrops jararaca	Q9YIB5
Glycosyl Hydrolase	5	Bpl-13067_c3_g2_i1	Hyaluronidase	Acropora digitifera	adi_v1.06821
		Bpl-13067_c3_g2_i2	Hyaluronidase	Acropora digitifera	adi_v1.06821
		Bpl-13616_c0_g3_i7	Kunitz-type serine protease inhibitor taicotoxin	Oxyuranus scutellatus scutellatus	B7S4N9
		Bpl-13203_c4_g1_i3	Glycoside hydrolase	Chrysaora fuscescens	comp13219_c0_seq1
		Bpl-13203_c4_g3_i1	Glycoside hydrolase	Chrysaora fuscescens	comp13219_c0_seq1
Lipase	3	Bpl-13216_c0_g1_i1	Lipase	Acropora digitifera	adi_v1.09322
		Bpl-13478_c1_g1_i1	Lipase	Acropora digitifera	adi_v1.09322
		Bpl-4421_c0_g1_i1	Lipase	Acropora digitifera	adi_v1.01810
Metallopeptidase	43	Bpl-1143_c0_g1_i1	Metalloprotease	Chrysaora fuscescens	comp14070_c0_seq1
		Bpl-11918_c0_g1_i1	Metalloprotease	Chrysaora fuscescens	comp14070_c0_seq1
		Bpl-11918_c0_g1_i3	Metalloprotease	Chrysaora fuscescens	comp14070_c0_seq1
		Bpl-11918_c0_g1_i5	Metalloprotease	Chrysaora fuscescens	comp14070_c0_seq1
		Bpl-11918_c0_g1_i7	Metalloprotease	Chrysaora fuscescens	comp14070_c0_seq1
		Bpl-12198_c8_g1_i1	Metalloprotease (Nematocyte expressed protein 6)	Acropora digitifera	adi_v1.17845
		Bpl-12326_c1_g6_i2	Metalloprotease (Nematocyte expressed protein 6)	Acropora digitifera	adi_v1.13648
		Bpl-12414_c6_g1_i5	Metalloprotease	Chrysaora fuscescens	comp12208_c0_seq1
		Bpl-12414_c6_g3_i1	Metalloprotease	Chrysaora fuscescens	comp12208_c0_seq1
		Bpl-12524_c0_g1_i1	Metalloprotease	Chrysaora fuscescens	comp11571_c0_seq2
		Bpl-12524_c0_g1_i10	Metalloprotease	Chrysaora fuscescens	comp12218_c0_seq1
		Bpl-12524_c0_g1_i2	Metalloprotease	Chrysaora fuscescens	comp12218_c0_seq1
		Bpl-12524_c0_g1_i4	Metalloprotease	Chrysaora fuscescens	comp12218_c0_seq1
		Bpl-12524_c0_g1_i6	Metalloprotease	Chrysaora fuscescens	comp11571_c0_seq2
		Bpl-12721_c1_g1_i3	Metalloprotease	Chrysaora fuscescens	comp12208_c0_seq1
		Bpl-12721_c1_g1_i5	Metalloprotease	Chrysaora fuscescens	comp12208_c0_seq1
		Bpl-12721_c1_g2_i1	Metalloprotease	Chrysaora fuscescens	comp12208_c0_seq1
		Bpl-12721_c1_g2_i2	Metalloprotease	Chrysaora fuscescens	comp12208_c0_seq1
		Bpl-12990_c4_g1_i11	Metalloprotease	Chrysaora fuscescens	comp11996_c0_seq1
		Bpl-12990_c4_g1_i15	Metalloprotease	Chrysaora fuscescens	comp11996_c0_seq1
		Bpl-12990_c4_g1_i17	Metalloprotease	Chrysaora fuscescens	comp13691_c0_seq2
		Bpl-12994_c0_g1_i1	Metalloprotease (Nematocyte expressed protein 6)	Acropora digitifera	adi_v1.17845
		Bpl-12994_c0_g1_i2	Metalloprotease (Nematocyte expressed protein 6)	Acropora digitifera	adi_v1.17845
		Bpl-13055_c1_g1_i4	Metalloprotease	Chrysaora fuscescens	comp13691_c0_seq2
		Bpl-13055_c1_g1_i9	Metalloprotease	Chrysaora fuscescens	comp13691_c0_seq2
		Bpl-13055_c1_g2_i1	Metalloprotease	Chrysaora fuscescens	comp13691_c0_seq2
		Bpl-13055_c1_g2_i11	Metalloprotease	Chrysaora fuscescens	comp13691_c0_seq2
		Bpl-13055_c1_g2_i12	Metalloprotease	Chrysaora fuscescens	comp13691_c0_seq2
		Bpl-13055_c1_g2_i15	Metalloprotease	Chrysaora fuscescens	comp13691_c0_seq2
		Bpl-13055_c1_g2_i16	Metalloprotease	Chrysaora fuscescens	comp13691_c0_seq2
		Bpl-13055_c1_g2_i4	Metalloprotease	Chrysaora fuscescens	comp13691_c0_seq2
		Bpl-13055_c1_g2_i5	Metalloprotease	Chrysaora fuscescens	comp13691_c0_seq2
		Bpl-13055_c1_g2_i6	Metalloprotease	Chrysaora fuscescens	comp13691_c0_seq2
		Bpl-13182_c1_g2_i5	Metalloprotease	Chrysaora fuscescens	comp12208_c0_seq1
		Bpl-13236_c3_g1_i1	Metalloprotease	Chrysaora fuscescens	comp11571_c0_seq2
		Bpl-13236_c3_g2_i1	Metalloprotease	Chrysaora fuscescens	comp13767_c0_seq1
		Bpl-13602_c4_g2_i1	Metalloprotease (Nematocyte expressed protein 6)	Acropora digitifera	adi_v1.17845
		Bpl-13602_c4_g2_i2	Metalloprotease (Nematocyte expressed protein 6)	Acropora digitifera	adi_v1.17845
		Bpl-13609_c1_g1_i1	Metalloprotease	Chrysaora fuscescens	comp10942_c1_seq1
		Bpl-13624_c4_g1_i14	Metalloprotease	Chrysaora fuscescens	comp13691_c0_seq2
		Bpl-13624_c4_g1_i7	Metalloprotease	Chrysaora fuscescens	comp13691_c0_seq2
		Bpl-15730_c0_g1_i1	Metalloprotease (Nematocyte expressed protein 6)	Acropora digitifera	adi_v1.17845
		Bpl-8308_c0_g1_i1	Metalloprotease (Nematocyte expressed protein 6)	Acropora digitifera	adi_v1.17845
Phosphodiesterase	1	Bpl-12943_c0_g1_i8	Venom phosphodiesterase 2	Crotalus adamanteus	J3SBP3
Phospholipase	5	Bpl-12457_c0_g1_i1	Phospholipase A1	Acropora digitifera	adi_v1.12434
		Bpl-12457_c0_g1_i4	Phospholipase A1	Acropora digitifera	adi_v1.12434
		Bpl-12457_c0_g1_i5	Phospholipase A1	Acropora digitifera	adi_v1.12434
		Bpl-12457_c0_g1_i6	Phospholipase A1	Acropora digitifera	adi_v1.12434
		Bpl-5421_c0_g1_i1	Phospholipase A2 A2-actitoxin-Cgg2a	Condylactis gigantea	D2X8K2
Serine peptidase	11	Bpl-12081_c0_g2_i1	Serine protease	Chrysaora fuscescens	comp13655_c0_seq2
		Bpl-12081_c0_g3_i1	Serine protease	Chrysaora fuscescens	comp13655_c0_seq2
		Bpl-13552_c1_g1_i13	Serine protease	Chrysaora fuscescens	comp13655_c0_seq2
		Bpl-13552_c1_g1_i3	Serine protease	Chrysaora fuscescens	comp13655_c0_seq2
		Bpl-13769_c0_g1_i20	Serine-type endopeptidase (Blarina toxin)	Acropora digitifera	adi_v1.08904
		Bpl-13769_c0_g1_i3	Serine-type endopeptidase (Blarina toxin)	Acropora digitifera	adi_v1.08904
		Bpl-13769_c0_g1_i8	Serine-type endopeptidase (Blarina toxin)	Acropora digitifera	adi_v1.08904
		Bpl-13055_c1_g2_i8	Serine protease	Chrysaora fuscescens	comp13691_c0_seq2
		Bpl-13182_c1_g2_i4	Serine protease	Chrysaora fuscescens	comp12208_c0_seq1
		Bpl-13769_c0_g2_i1	Serine-type endopeptidase (Blarina toxin)	Acropora digitifera	adi_v1.08904
		Bpl-13831_c1_g5_i2	Serine protease	Chrysaora fuscescens	comp13655_c0_seq2
Serine peptidase inhibitor (kunitz-like)	23	Bpl-10269_c0_g1_i1	Protease inhibitor 1	Walterinnesia aegyptia	C1IC50
		Bpl-10884_c0_g1_i1	Kunitz-type serine protease inhibitor ki-VN	Vipera nikolskii	E5AJX3
		Bpl-10963_c0_g1_i4	Kunitz-type serine protease inhibitor	Anthopleura elegantissima	comp52876_c0_seq2(A)
		Bpl-11067_c0_g1_i3	Kunitz-type U19-barytoxin-Tl1a	Trittame loki	W4VSH9
		Bpl-12183_c0_g1_i1	Kunitz-type serine protease inhibitor taicotoxin	Oxyuranus scutellatus scutellatus	B7S4N9
		Bpl-12183_c0_g1_i5	U-actitoxin-Avd3h	Anemonia viridis	P0DN09
		Bpl-12183_c0_g1_i7	U-actitoxin-Avd3m	Anemonia viridis	P0DN14
		Bpl-12183_c0_g1_i8	Kunitz-type serine protease inhibitor taicotoxin	Oxyuranus scutellatus scutellatus	B7S4N9
		Bpl-12183_c0_g1_i9	U-actitoxin-Avd3m	Anemonia viridis	P0DN14
		Bpl-12231_c0_g1_i1	U-actitoxin-Avd3i	Anemonia viridis	P0DN10
		Bpl-12231_c0_g1_i2	U-actitoxin-Avd3i	Anemonia viridis	P0DN10
		Bpl-12231_c0_g1_i3	U-actitoxin-Avd3i	Anemonia viridis	P0DN10
		Bpl-12231_c0_g2_i1	U-actitoxin-Avd3n	Anthopleura elegantissima	comp64502_c0_seq1(NA)
		Bpl-12231_c0_g3_i1	Kunitz-type serine protease inhibitor bitisilin-1	Bitis gabonica	Q6T6T5
		Bpl-12231_c0_g3_i2	U-actitoxin-Avd3n	Anthopleura elegantissima	comp66327_c0_seq3(A)
		Bpl-12231_c0_g3_i4	Kunitz-type serine protease inhibitor bitisilin-1	Bitis gabonica	Q6T6T5
		Bpl-12231_c0_g4_i1	U-actitoxin-Avd3n	Anthopleura elegantissima	comp70091_c0_seq1(NA)
		Bpl-1440_c0_g1_i1	Kunitz-type serine protease inhibitor homolog dendrotoxin K	Dendroaspis polylepis polylepis	P00981
		Bpl-15326_c0_g1_i1	Kunitz-type serine protease inhibitor LmKTT-1a	Lychas mucronatus	P0DJ46
		Bpl-15757_c0_g1_i1	U-actitoxin-Avd3f	Anemonia viridis	P0DN06
		Bpl-8914_c0_g1_i4	Kunitz-type serine protease inhibitor LmKTT-1a	Lychas mucronatus	P0DJ46
		Bpl-9677_c0_g1_i1	U-actitoxin-Avd3n	Anthopleura elegantissima	comp66327_c0_seq3(A)
		Bpl-9972_c0_g1_i1	Turripeptide Ici9.2	Iotyrris cingulifera	P0DKT4
Other	5	Bpl-12822_c0_g1_i1	C-type lectin	Chrysaora fuscescens	comp13880_c0_seq1
		Bpl-12822_c0_g1_i2	C-type lectin	Chrysaora fuscescens	comp13880_c0_seq1
		Bpl-12822_c0_g1_i4	C-type lectin	Chrysaora fuscescens	comp13880_c0_seq1
		Bpl-13595_c0_g2_i13	C-type lectin	Chrysaora fuscescens	comp13880_c0_seq1
		Bpl-13595_c0_g2_i9	C-type lectin	Chrysaora fuscescens	comp13880_c0_seq1
No domains	6	Bpl-12448_c8_g1_i4	Phospholipase A2 (Conodipine-M)	Acropora digitifera	adi_v1.18628
		Bpl-12822_c0_g1_i3	C-type lectin	Chrysaora fuscescens	comp13880_c0_seq1
		Bpl-13595_c0_g3_i1	C-type lectin	Chrysaora fuscescens	comp13880_c0_seq1
		Bpl-13642_c0_g1_i1	C-type lectin	Chrysaora fuscescens	comp13880_c0_seq1
		Bpl-13642_c0_g2_i2	C-type lectin	Chrysaora fuscescens	comp13880_c0_seq1
		Bpl-9680_c0_g1_i2	Protein-glutamate O-methyltransferase	Acropora digitifera	adi_v1.10508
HAVE MASS SPEC EVIDENCE
ANNOTATED FROM UNIPROT TOXPROT
ANNOTATED FROM Ponce et al., 2016
ANNOTATED FROM Macrander et al., 2015
ANNOTATED FROM Gacesa et al., 2015
