# Supplementary material for: Recruitment of toxin-like proteins with ancestral venom function supports endoparasitic lifestyles of Myxozoa
Source: PeerJ. 2021 Apr 26;9:e11208. doi: 10.7717/peerj.11208 (PMC8083181; doi:10.7717/peerj.11208)
Supplement: Supplemental Information 20 [file peerj-09-11208-s020.xlsx]

## Sheet: Mixed Myxosporean
Toxin Group	No. of transcripts	Transcript Header	Annotation from custom ToxDB	Annotation from custom ToxDB	Accession/Sequence ID
5’ Nucleotidase	1	Myx-37182_c0_g1_i1	Snake venom 5'-nucleotidase	Snake venom 5'-nucleotidase	F8S0Z7
Alpha-2-Macroglobulin	1	Myx-37648_c0_g1_i1	A.superbus venom factor 2	A.superbus venom factor 3	A0RZC6
Aspartic peptidase	1	Myx-10323_c0_g1_i1	Aspartyl protease	Aspartyl protease	comp13494_c0_seq1
C-type Lectin	4	Myx-10345_c0_g1_i1	Snaclec 7	Snaclec 8	adi_v1.12298
		Myx-18848_c0_g1_i1	C-type lectin galactose-binding isoform	C-type lectin galactose-binding isoform	D2YVI2
		Myx-34579_c0_g1_i2*	C-type lectin	C-type lectin	comp13792_c0_seq2
		Myx-40707_c0_g1_i2	C-type lectin	C-type lectin	comp13880_c0_seq1
CRISP	3	Myx-3302_c0_g1_i1	Venom allergen 5.01	Venom allergen 5.02	P10736
		Myx-33966_c0_g1_i1	Venom allergen 5	Venom allergen 6	Q05108
		Myx-57164_c0_g1_i1	Venom allergen	Venom allergen	comp13672_c0_seq1
Cysteine peptidase inhibitor	2	Myx-44040_c2_g3_i6*	Cystatin	Cystatin	E3P6N7
		Myx-44040_c2_g3_i8*	Cystatin	Cystatin	E3P6N7
Fibrogen related	4	Myx-42878_c2_g10_i1	Snaclec crotocetin-1	Snaclec crotocetin-2	Q719L9
		Myx-42878_c2_g10_i2	Snaclec crotocetin-1	Snaclec crotocetin-2	Q719L9
		Myx-43970_c0_g1_i2*	Verrucotoxin subunit beta	Verrucotoxin subunit beta	Q98993
		Myx-43970_c0_g1_i4*	Verrucotoxin subunit beta	Verrucotoxin subunit beta	Q98993
Glutaminyl-peptide cyclotransferase	1	Myx-28450_c0_g1_i2*	Glutaminyl-peptide cyclotransferase	Glutaminyl-peptide cyclotransferase	A7ISW2
Glycosyl hydrolase	4	Myx-29346_c0_g1_i1	Glycoside hydrolase	Glycoside hydrolase	comp13219_c0_seq1
		Myx-29346_c0_g2_i1	Glycoside hydrolase	Glycoside hydrolase	comp13219_c0_seq1
		Myx-30978_c0_g1_i1	Hyaluronidase	Hyaluronidase	adi_v1.06821
		Myx-30978_c0_g2_i1	Hyaluronidase-2	Hyaluronidase-3	A3QVP0
Lipase	5	Myx-40246_c0_g1_i2	Venom carboxylesterase-6	Venom carboxylesterase-7	B2D0J5
		Myx-40246_c0_g1_i4	Serine carboxypeptidase	Serine carboxypeptidase	adi_v1.05180
		Myx-40246_c0_g1_i5	Serine carboxypeptidase	Serine carboxypeptidase	adi_v1.05180
		Myx-7309_c0_g1_i1	Venom carboxylesterase-6	Venom carboxylesterase-7	B2D0J5
		Myx-45425_c0_g1_i1	Lipase	Lipase	adi_v1.01810
Metallopeptidase	15	Myx-22596_c0_g1_i1	Metalloprotease	Metalloprotease	comp12208_c0_seq1
		Myx-22596_c0_g2_i1	Metalloprotease	Metalloprotease	comp12208_c0_seq1
		Myx-28255_c0_g1_i1	Metalloprotease	Metalloprotease	comp9530_c0_seq2
		Myx-29648_c0_g1_i1	Metalloprotease	Metalloprotease	comp11996_c0_seq1
		Myx-29648_c0_g2_i1	Metalloprotease	Metalloprotease	comp11996_c0_seq1
		Myx-29743_c0_g1_i1*	Metalloprotease (Nematocyte expressed protein 6)	Metalloprotease (Nematocyte expressed protein 6)	adi_v1.17845
		Myx-36569_c0_g1_i1	Metalloprotease	Metalloprotease	comp13691_c0_seq2
		Myx-41388_c0_g2_i1	Zinc metalloproteinase-disintegrin-like berythractivase	Zinc metalloproteinase-disintegrin-like berythractivase	Q8UVG0
		Myx-41388_c0_g2_i2	Zinc metalloproteinase-disintegrin-like NaMP	Zinc metalloproteinase-disintegrin-like NaMP	A8QL59
		Myx-41388_c0_g2_i3	Zinc metalloproteinase-disintegrin-like ACLD	Zinc metalloproteinase-disintegrin-like ACLD	O42138
		Myx-41388_c0_g2_i4	Zinc metalloproteinase-disintegrin-like berythractivase	Zinc metalloproteinase-disintegrin-like berythractivase	Q8UVG0
		Myx-49651_c0_g1_i1	Metalloprotease	Metalloprotease	comp12208_c0_seq1
		Myx-51053_c0_g1_i1	Venom carboxylesterase-6	Venom carboxylesterase-7	B2D0J5
		Myx-51892_c0_g1_i1	Metalloprotease	Metalloprotease	comp13691_c0_seq2
		Myx-56836_c0_g1_i1	Venom metalloproteinase antarease TserMP_A (Fragment)	Venom metalloproteinase antarease TserMP_A (Fragment)	P86392
Natterin	1	Myx-44147_c1_g1_i3	Natterin-4	Natterin-5	Q66S13
No domains	3	Myx-43729_c0_g1_i1*	Stonustoxin subunit beta	Stonustoxin subunit beta	Q98989
		Myx-34203_c0_g1_i1	C-type lectin	C-type lectin	comp13880_c0_seq1
		Myx-34203_c0_g1_i2	C-type lectin	C-type lectin	comp13880_c0_seq1
Other	6	Myx-44017_c0_g1_i11	Galactose-specific lectin nattectin	Galactose-specific lectin nattectin	Q66S03
		Myx-44017_c0_g1_i13	Galactose-specific lectin nattectin	Galactose-specific lectin nattectin	Q66S03
		Myx-44017_c0_g1_i16	Galactose-specific lectin nattectin	Galactose-specific lectin nattectin	Q66S03
		Myx-41269_c1_g6_i2*	Vascular endothelial growth factor A	Vascular endothelial growth factor A	C0K3N5
		Myx-44328_c1_g1_i14	Phosphodiesterase	Phosphodiesterase	adi_v1.12125
		Myx-52151_c0_g1_i1	Phosphodiesterase	Phosphodiesterase	adi_v1.12125
Phosphodiesterase	1	Myx-42334_c3_g2_i1*	Venom phosphodiesterase 2	Venom phosphodiesterase 3	J3SBP3
Phospholipase	5	Myx-38218_c1_g2_i1	Phospholipase A1	Phospholipase A2	P0CH87
		Myx-39031_c0_g1_i1	Phospholipase A1	Phospholipase A2	adi_v1.12434
		Myx-40163_c0_g1_i1	Phospholipase A1	Phospholipase A2	adi_v1.12434
		Myx-42316_c0_g1_i1	Phospholipase A1	Phospholipase A2	adi_v1.12434
		Myx-42316_c0_g3_i1	Phospholipase A1	Phospholipase A2	P0CH87
Serine peptidase	17	Myx-14582_c0_g1_i1	Venom protease	Venom protease	Q7M4I3
		Myx-30266_c0_g1_i1	Serine-type endopeptidase (Blarina toxin)	Serine-type endopeptidase (Blarina toxin)	adi_v1.08904
		Myx-32233_c0_g1_i1	Serine protease	Serine protease	comp13655_c0_seq2
		Myx-36548_c0_g2_i1	Serine protease	Serine protease	comp13655_c0_seq2
		Myx-36873_c0_g1_i1	Blarina toxin	Blarina toxin	Q76B45
		Myx-37893_c0_g1_i1	Serine-type endopeptidase (Blarina toxin)	Serine-type endopeptidase (Blarina toxin)	adi_v1.08904
		Myx-40895_c1_g1_i1	Thrombin-like enzyme cerastocytin	Thrombin-like enzyme cerastocytin	Q7SYF1
		Myx-42599_c2_g1_i1*	Thrombin-like enzyme gyroxin analog	Thrombin-like enzyme gyroxin analog	P33589
		Myx-42630_c0_g1_i4*	Blarina toxin	Blarina toxin	Q76B45
		Myx-47534_c0_g1_i1	Venom serine carboxypeptidase	Venom serine carboxypeptidase	C9WMM5
		Myx-57255_c0_g1_i1	Serine protease	Serine protease	comp13655_c0_seq2
		Myx-58063_c0_g1_i1	Coagulation factor X	Coagulation factor X	adi_v1.15821
		Myx-6046_c0_g1_i1	Venom serine protease 34	Venom serine protease 35	Q8MQS8
		Myx-35638_c0_g1_i1	Venom dipeptidyl peptidase 4	Venom dipeptidyl peptidase 5	B1A4F7
		Myx-48585_c0_g1_i1	Venom dipeptidyl peptidase 4	Venom dipeptidyl peptidase 5	B1A4F7
		Myx-8487_c0_g1_i1	Venom dipeptidyl peptidase 4	Venom dipeptidyl peptidase 5	B1A4F7
		Myx-12160_c0_g1_i1	Serine protease	Serine protease	comp13655_c0_seq2
Serine peptidase inhibitor	16	Myx-22570_c0_g1_i1	U-actitoxin-Avd3f	U-actitoxin-Avd3f	comp56035_c0_seq3(A)
		Myx-28195_c0_g1_i1	PI-actitoxin-Aeq3a	PI-actitoxin-Aeq3a	comp64490_c0_seq1(A)
		Myx-28195_c0_g1_i2	PI-actitoxin-Aeq3a	PI-actitoxin-Aeq3a	comp64490_c0_seq1(A)
		Myx-28346_c0_g1_i1	Kunitz-type serine protease inhibitor 2	Kunitz-type serine protease inhibitor 3	P00985
		Myx-28524_c0_g1_i1	Kunitz-type serine protease inhibitor 5	Kunitz-type serine protease inhibitor 6	comp52876_c0_seq2(A)
		Myx-30338_c0_g1_i1	Vasotab	Vasotab	P84843
		Myx-31835_c0_g1_i1	Kunitz-type U19-barytoxin-Tl1a	Kunitz-type U19-barytoxin-Tl1a	W4VSH9
		Myx-32627_c0_g1_i1*	Putative Kunitz-type serine protease inhibitor	Putative Kunitz-type serine protease inhibitor	B2BS84
		Myx-35411_c0_g1_i1	Kunitz-type serine protease inhibitor scutellin-4	Kunitz-type serine protease inhibitor scutellin-5	B5KL30
		Myx-41814_c0_g2_i5*	Putative Kunitz-type serine protease inhibitor	Putative Kunitz-type serine protease inhibitor	B2BS84
		Myx-44052_c0_g2_i1	Kunitz-type serine protease inhibitor bitisilin-1	Kunitz-type serine protease inhibitor bitisilin-2	Q6T6T5
		Myx-44052_c0_g2_i2	Kunitz-type serine protease inhibitor bitisilin-1	Kunitz-type serine protease inhibitor bitisilin-2	Q6T6T5
		Myx-44052_c0_g2_i3	PI-actitoxin-Aeq3a	PI-actitoxin-Aeq3a	comp64490_c0_seq1(A)
		Myx-44052_c0_g2_i4	Kunitz-type serine protease inhibitor bitisilin-1	Kunitz-type serine protease inhibitor bitisilin-2	Q6T6T5
		Myx-44052_c0_g2_i5	Kunitz-type serine protease inhibitor bitisilin-1	Kunitz-type serine protease inhibitor bitisilin-2	Q6T6T5
		Myx-44052_c0_g5_i1	Kunitz-type U19-barytoxin-Tl1a	Kunitz-type U19-barytoxin-Tl1a	W4VSH9
SNTX/VTX toxin family	5	Myx-42946_c0_g1_i1*	Stonustoxin subunit beta	Stonustoxin subunit beta	Q98989
		Myx-42946_c0_g1_i3*	Neoverrucotoxin subunit alpha	Neoverrucotoxin subunit alpha	A0ZSK3
		Myx-42946_c0_g1_i5*	Stonustoxin subunit beta	Stonustoxin subunit beta	Q98989
		Myx-44342_c0_g6_i1	Neoverrucotoxin subunit alpha	Neoverrucotoxin subunit alpha	A0ZSK3
		Myx-26060_c0_g1_i1	Stonustoxin subunit beta	Stonustoxin subunit beta	Q98989
Venom phosphatase	1	Myx-31947_c0_g1_i2	Venom acid phosphatase Acph-1	Venom acid phosphatase Acph-2	Q5BLY5
HAVE MASS SPEC EVIDENCE
ANNOTATED FROM UNIPROT TOXPROT
ANNOTATED FROM Ponce et al., 2016
ANNOTATED FROM Macrander et al., 2015
ANNOTATED FROM Gacesa et al., 2015
*putative chimeric sequences
