# Supplementary material for: Recruitment of toxin-like proteins with ancestral venom function supports endoparasitic lifestyles of Myxozoa
Source: PeerJ. 2021 Apr 26;9:e11208. doi: 10.7717/peerj.11208 (PMC8083181; doi:10.7717/peerj.11208)
Supplement: Supplemental Information 21 [file peerj-09-11208-s021.xlsx]

## Sheet: C. cruxmelitensis
Toxin Group	No. of transcripts	Transcript Header	Annotation from custom ToxDB	Species with closest homology	Accession/Sequence ID
Aspartic peptidase	1	Ccr-11380_c0_g1_i1	Aspartyl protease	Chrysaora fuscescens	comp13494_c0_seq1
C-type Lectin	10	Ccr-1760_c0_g1_i1	C-type lectin	Chrysaora fuscescens	comp13880_c0_seq1
		Ccr-18216_c0_g1_i2	C-type lectin	Chrysaora fuscescens	comp13792_c0_seq2
		Ccr-23188_c0_g2_i1	Snaclec A6	Macrovipera lebetina	B4XSZ6
		Ccr-24528_c2_g3_i1	Galactose-specific lectin nattectin	Thalassophryne nattereri	Q66S03
		Ccr-25647_c0_g2_i1	C-type lectin	Chrysaora fuscescens	comp13792_c0_seq2
		Ccr-25829_c1_g2_i1	Snaclec 7	Acropora digitifera	adi_v1.12298
		Ccr-25829_c1_g2_i3	Snaclec 7	Acropora digitifera	adi_v1.12298
		Ccr-293_c0_g1_i2	C-type lectin	Chrysaora fuscescens	comp13880_c0_seq1
		Ccr-5744_c0_g1_i1	C-type lectin lectoxin-Lio3	Erythrolamprus poecilogyrus	A7X413
		Ccr-6037_c0_g1_i1	C-type lectin	Chrysaora fuscescens	comp13880_c0_seq1
CRISP	12	Ccr-9246_c0_g1_i1	Venom allergen	Chrysaora fuscescens	comp13672_c0_seq1
		Ccr-21310_c0_g1_i1	Venom allergen	Chrysaora fuscescens	comp13791_c0_seq1
		Ccr-21310_c0_g1_i2	Venom allergen	Chrysaora fuscescens	comp13672_c0_seq1
		Ccr-21310_c0_g1_i3	Venom allergen	Chrysaora fuscescens	comp13672_c0_seq1
		Ccr-21310_c0_g1_i4	Venom allergen	Chrysaora fuscescens	comp13672_c0_seq1
		Ccr-26310_c2_g2_i2	Venom allergen	Chrysaora fuscescens	comp13672_c0_seq1
		Ccr-26310_c2_g2_i4	Venom allergen	Chrysaora fuscescens	comp13672_c0_seq1
		Ccr-26432_c1_g2_i2	Venom allergen	Chrysaora fuscescens	comp13672_c0_seq1
		Ccr-26432_c1_g2_i4	Venom allergen	Chrysaora fuscescens	comp13672_c0_seq1
		Ccr-27333_c0_g1_i3	Venom allergen	Chrysaora fuscescens	comp12264_c0_seq1
		Ccr-29260_c0_g1_i1	Venom allergen	Chrysaora fuscescens	comp13672_c0_seq1
		Ccr-8405_c0_g1_i1	Venom allergen	Chrysaora fuscescens	comp13791_c0_seq1
Dnase II Phospholipase D	1	Ccr-26776_c2_g1_i2	Plancitoxin-1	Acanthaster planci	Q75WF2
Fibrogen related	24	Ccr-18445_c0_g1_i2	Ryncolin-2	Cerberus rynchops	D8VNS8
		Ccr-21625_c0_g4_i1	Ryncolin-4	Acropora digitifera	adi_v1.22096
		Ccr-21830_c0_g1_i2	Ryncolin-4	Cerberus rynchops	D8VNT0
		Ccr-22389_c3_g3_i1	Ryncolin-4	Acropora digitifera	adi_v1.22096
		Ccr-22413_c1_g3_i1	Ryncolin-4	Acropora digitifera	adi_v1.22096
		Ccr-22424_c4_g3_i3	Ryncolin-4	Acropora digitifera	adi_v1.22096
		Ccr-22477_c0_g2_i3	Ryncolin-4	Cerberus rynchops	D8VNT0
		Ccr-22622_c0_g3_i3	Ryncolin-4	Cerberus rynchops	D8VNT0
		Ccr-24421_c0_g2_i1	Ryncolin-2	Cerberus rynchops	D8VNS8
		Ccr-24421_c0_g2_i3	Ryncolin-3	Cerberus rynchops	D8VNS9
		Ccr-24421_c0_g2_i5	Zinc metalloproteinase-disintegrin-like	Cerberus rynchops	D8VNS7
		Ccr-24421_c0_g2_i9	Zinc metalloproteinase-disintegrin-like	Cerberus rynchops	D8VNS7
		Ccr-25405_c4_g1_i1	Veficolin-1 (Fragment)	Varanus komodoensis	E2IYB3
		Ccr-25498_c7_g1_i5	Ryncolin-4	Acropora digitifera	adi_v1.22096
		Ccr-26428_c0_g4_i2	Ryncolin-4	Acropora digitifera	adi_v1.22096
		Ccr-26428_c0_g4_i3	Ryncolin-4	Acropora digitifera	adi_v1.22096
		Ccr-26583_c2_g1_i3	Zinc metalloproteinase-disintegrin-like	Cerberus rynchops	D8VNS7
		Ccr-26795_c1_g1_i2	Ryncolin-4	Acropora digitifera	adi_v1.22096
		Ccr-27113_c1_g1_i15	Ryncolin-4	Cerberus rynchops	D8VNT0
		Ccr-27474_c0_g1_i2	Ryncolin-4	Acropora digitifera	adi_v1.22096
		Ccr-27474_c0_g1_i5	Ryncolin-4	Acropora digitifera	adi_v1.22096
		Ccr-27770_c8_g2_i2	Ryncolin-3	Cerberus rynchops	D8VNS9
		Ccr-28492_c0_g1_i2	Ryncolin-4	Acropora digitifera	adi_v1.22096
		Ccr-8397_c0_g1_i1	Ryncolin-4	Cerberus rynchops	D8VNT0
Glycosyl hydrolase	5	Ccr-22147_c7_g1_i1	Glycoside hydrolase	Chrysaora fuscescens	comp13219_c0_seq1
		Ccr-22147_c7_g1_i6	Glycoside hydrolase	Chrysaora fuscescens	comp13219_c0_seq1
		Ccr-22270_c1_g4_i2	Glycoside hydrolase	Chrysaora fuscescens	comp13219_c0_seq1
		Ccr-22270_c1_g4_i3	Glycoside hydrolase	Chrysaora fuscescens	comp13219_c0_seq1
		Ccr-20386_c0_g1_i1	Hyaluronidase	Acropora digitifera	adi_v1.06821
Lipase	8	Ccr-21980_c4_g6_i1	Lipase	Acropora digitifera	adi_v1.04835
		Ccr-23289_c1_g1_i1	Lipase	Acropora digitifera	adi_v1.09322
		Ccr-23859_c2_g1_i11	Lipase	Acropora digitifera	adi_v1.04835
		Ccr-23859_c2_g1_i12	Lipase	Acropora digitifera	adi_v1.04835
		Ccr-23859_c2_g1_i6	Lipase	Acropora digitifera	adi_v1.04835
		Ccr-26741_c1_g2_i1	Phospholipase A1	Acropora digitifera	adi_v1.12434
		Ccr-27528_c1_g2_i2	Lipase	Acropora digitifera	adi_v1.04835
		Ccr-27528_c1_g2_i9	Lipase	Acropora digitifera	adi_v1.04835
Metallopeptidase	91	Ccr-13630_c0_g1_i1	Metalloprotease	Chrysaora fuscescens	comp11996_c0_seq1
		Ccr-13630_c0_g2_i1	Metalloprotease	Chrysaora fuscescens	comp11996_c0_seq1
		Ccr-14521_c0_g1_i1	Metalloprotease (Nematocyte expressed protein 6)	Acropora digitifera	adi_v1.17845
		Ccr-17416_c0_g1_i1	Metalloprotease (Nematocyte expressed protein 6)	Acropora digitifera	adi_v1.17845
		Ccr-17416_c0_g2_i1	Metalloprotease (Nematocyte expressed protein 6)	Acropora digitifera	adi_v1.20368
		Ccr-17639_c0_g1_i1	Metalloprotease (Nematocyte expressed protein 6)	Acropora digitifera	adi_v1.17845
		Ccr-19686_c0_g1_i2	Metalloprotease	Chrysaora fuscescens	comp13767_c0_seq1
		Ccr-20157_c0_g1_i2	Metalloprotease (Nematocyte expressed protein 6)	Acropora digitifera	adi_v1.17845
		Ccr-20474_c0_g1_i6	Metalloprotease	Chrysaora fuscescens	comp12208_c0_seq1
		Ccr-20798_c0_g1_i1	Metalloprotease	Chrysaora fuscescens	comp10942_c1_seq1
		Ccr-21107_c0_g1_i1	Serine-type endopeptidase (Blarina toxin)	Acropora digitifera	adi_v1.08904
		Ccr-21181_c0_g1_i1	Metalloprotease (Astacin-like toxin)	Acropora digitifera	adi_v1.15751
		Ccr-21181_c0_g1_i12	Metalloprotease (Astacin-like toxin)	Acropora digitifera	adi_v1.15751
		Ccr-21181_c0_g1_i2	Metalloprotease (Astacin-like toxin)	Acropora digitifera	adi_v1.15751
		Ccr-21181_c0_g1_i3	Metalloprotease (Astacin-like toxin)	Acropora digitifera	adi_v1.15751
		Ccr-21284_c0_g1_i2	Metalloprotease	Chrysaora fuscescens	comp10942_c1_seq1
		Ccr-21399_c0_g1_i2	Metalloprotease (Nematocyte expressed protein 6)	Acropora digitifera	adi_v1.17845
		Ccr-21399_c0_g1_i3	Metalloprotease (Nematocyte expressed protein 6)	Acropora digitifera	adi_v1.17845
		Ccr-21624_c0_g1_i1	Metalloprotease	Chrysaora fuscescens	comp11571_c0_seq2
		Ccr-21624_c0_g2_i1	Metalloprotease	Chrysaora fuscescens	comp11571_c0_seq2
		Ccr-21751_c0_g1_i1	Zinc metalloproteinase/disintegrin	Echis ocellatus	Q14FJ4
		Ccr-22938_c1_g3_i1	Metalloprotease (Nematocyte expressed protein 6)	Acropora digitifera	adi_v1.17845
		Ccr-23322_c6_g1_i2	Metalloprotease	Chrysaora fuscescens	comp13691_c0_seq2
		Ccr-24230_c0_g1_i4	Metalloprotease	Chrysaora fuscescens	comp13691_c0_seq2
		Ccr-24230_c0_g1_i5	Metalloprotease	Chrysaora fuscescens	comp13691_c0_seq2
		Ccr-24230_c0_g1_i6	Metalloprotease	Chrysaora fuscescens	comp11996_c0_seq1
		Ccr-24550_c2_g2_i2	Metalloprotease	Chrysaora fuscescens	comp13691_c0_seq2
		Ccr-24839_c1_g1_i1	Snake venom metalloproteinase BjussuMP-2 (Fragment)	Bothrops jararacussu	Q7T1T4
		Ccr-24839_c1_g1_i9	Snake venom metalloproteinase BaP1	Bothrops asper	P83512
		Ccr-24923_c0_g1_i2	Metalloprotease (Astacin-like toxin)	Acropora digitifera	adi_v1.15751
		Ccr-24923_c0_g1_i5	Metalloprotease (Astacin-like toxin)	Acropora digitifera	adi_v1.15751
		Ccr-25132_c0_g3_i2	Metalloprotease (Astacin-like toxin)	Acropora digitifera	adi_v1.07444
		Ccr-25132_c0_g3_i3	Metalloprotease (Astacin-like toxin)	Acropora digitifera	adi_v1.07444
		Ccr-26049_c0_g1_i1	Metalloprotease	Chrysaora fuscescens	comp13691_c0_seq2
		Ccr-26049_c0_g1_i3	Metalloprotease	Chrysaora fuscescens	comp13691_c0_seq2
		Ccr-26049_c0_g1_i4	Metalloprotease	Chrysaora fuscescens	comp13691_c0_seq2
		Ccr-26049_c0_g1_i6	Metalloprotease	Chrysaora fuscescens	comp13691_c0_seq2
		Ccr-26146_c0_g1_i1	Metalloprotease	Chrysaora fuscescens	comp13691_c0_seq2
		Ccr-26146_c0_g1_i2	Metalloprotease	Chrysaora fuscescens	comp13691_c0_seq2
		Ccr-26146_c0_g1_i3	Metalloprotease	Chrysaora fuscescens	comp13691_c0_seq2
		Ccr-26146_c0_g1_i4	Metalloprotease	Chrysaora fuscescens	comp13691_c0_seq2
		Ccr-26146_c1_g1_i2	Metalloprotease	Chrysaora fuscescens	comp13691_c0_seq2
		Ccr-26194_c0_g1_i1	Metalloprotease (Nematocyte expressed protein 6)	Acropora digitifera	adi_v1.13648
		Ccr-26194_c0_g1_i3	Metalloprotease (Nematocyte expressed protein 6)	Acropora digitifera	adi_v1.13648
		Ccr-26288_c0_g1_i11	Metalloprotease (Nematocyte expressed protein 6)	Acropora digitifera	adi_v1.17845
		Ccr-26288_c0_g1_i3	Metalloprotease (Nematocyte expressed protein 6)	Acropora digitifera	adi_v1.17845
		Ccr-26288_c0_g1_i8	Metalloprotease (Nematocyte expressed protein 6)	Acropora digitifera	adi_v1.17845
		Ccr-26288_c0_g1_i9	Metalloprotease (Nematocyte expressed protein 6)	Acropora digitifera	adi_v1.17845
		Ccr-26321_c0_g2_i12	Metalloprotease (Nematocyte expressed protein 6)	Acropora digitifera	adi_v1.13648
		Ccr-26441_c0_g1_i1	Metalloprotease	Chrysaora fuscescens	comp10942_c1_seq1
		Ccr-26441_c0_g1_i2	Metalloprotease	Chrysaora fuscescens	comp10942_c1_seq1
		Ccr-26469_c1_g1_i1	Metalloprotease	Chrysaora fuscescens	comp12218_c0_seq1
		Ccr-26526_c0_g1_i1	Metalloprotease	Chrysaora fuscescens	comp12218_c0_seq1
		Ccr-26526_c0_g1_i11	Metalloprotease	Chrysaora fuscescens	comp12218_c0_seq1
		Ccr-26526_c0_g1_i13	Metalloprotease	Chrysaora fuscescens	comp12218_c0_seq1
		Ccr-26526_c0_g1_i2	Metalloprotease	Chrysaora fuscescens	comp12218_c0_seq1
		Ccr-26526_c0_g1_i3	Metalloprotease	Chrysaora fuscescens	comp12218_c0_seq1
		Ccr-26526_c0_g1_i4	Metalloprotease	Chrysaora fuscescens	comp12218_c0_seq1
		Ccr-26526_c0_g1_i5	Metalloprotease	Chrysaora fuscescens	comp12218_c0_seq1
		Ccr-26526_c0_g1_i6	Metalloprotease	Chrysaora fuscescens	comp12218_c0_seq1
		Ccr-26526_c0_g1_i7	Metalloprotease	Chrysaora fuscescens	comp12218_c0_seq1
		Ccr-26526_c0_g2_i3	Metalloprotease	Chrysaora fuscescens	comp12218_c0_seq1
		Ccr-26565_c6_g1_i5	Zinc metalloproteinase-disintegrin-like EoMP06	Echis ocellatus	Q6X1T6
		Ccr-26740_c2_g1_i10	Metalloprotease (SVMP)	Acropora digitifera	adi_v1.19445
		Ccr-26740_c2_g1_i11	Metalloprotease (SVMP)	Acropora digitifera	adi_v1.19445
		Ccr-26740_c2_g1_i2	Zinc metalloproteinase-disintegrin BlatH1	Bothriechis lateralis	U5PZ28
		Ccr-26740_c2_g1_i6	Metalloprotease (SVMP)	Acropora digitifera	adi_v1.19445
		Ccr-26801_c1_g1_i1	Metalloprotease (Nematocyte expressed protein 6)	Acropora digitifera	adi_v1.17845
		Ccr-26801_c1_g1_i13	Metalloprotease (Nematocyte expressed protein 6)	Acropora digitifera	adi_v1.17845
		Ccr-26801_c1_g1_i14	Metalloprotease (Nematocyte expressed protein 6)	Acropora digitifera	adi_v1.17845
		Ccr-26801_c1_g1_i3	Metalloprotease (Nematocyte expressed protein 6)	Acropora digitifera	adi_v1.17845
		Ccr-26801_c1_g1_i5	Metalloprotease (Nematocyte expressed protein 6)	Acropora digitifera	adi_v1.17845
		Ccr-26801_c1_g1_i9	Metalloprotease (Nematocyte expressed protein 6)	Acropora digitifera	adi_v1.17845
		Ccr-26801_c1_g6_i1	Metalloprotease (Nematocyte expressed protein 6)	Acropora digitifera	adi_v1.17845
		Ccr-28080_c3_g1_i1	Zinc metalloproteinase-disintegrin-like	Cerberus rynchops	D8VNS0
		Ccr-28128_c2_g2_i2	Metalloprotease	Chrysaora fuscescens	comp14070_c0_seq1
		Ccr-28505_c8_g2_i1	Zinc metalloproteinase-disintegrin-like berythractivase	Bothrops erythromelas	Q8UVG0
		Ccr-28505_c8_g2_i5	Zinc metalloproteinase-disintegrin-like berythractivase	Bothrops erythromelas	Q8UVG0
		Ccr-28540_c1_g1_i1	Metalloprotease	Chrysaora fuscescens	comp13691_c0_seq2
		Ccr-28540_c1_g1_i2	Metalloprotease	Chrysaora fuscescens	comp13691_c0_seq2
		Ccr-28540_c1_g1_i3	Metalloprotease	Chrysaora fuscescens	comp13691_c0_seq2
		Ccr-30018_c0_g1_i1	Metalloprotease (Astacin-like toxin)	Acropora digitifera	adi_v1.15751
		Ccr-32662_c0_g1_i1	Metalloprotease	Chrysaora fuscescens	comp14393_c0_seq1
		Ccr-35677_c0_g1_i1	Metalloprotease (Nematocyte expressed protein 6)	Acropora digitifera	adi_v1.17845
		Ccr-39038_c0_g1_i1	Metalloprotease	Chrysaora fuscescens	comp13767_c0_seq1
		Ccr-5679_c0_g1_i1	Metalloprotease	Chrysaora fuscescens	comp10942_c1_seq1
		Ccr-7815_c0_g2_i1	Metalloprotease	Chrysaora fuscescens	comp13691_c0_seq2
		Ccr-8046_c0_g1_i1	Metalloprotease (Astacin-like toxin)	Acropora digitifera	adi_v1.15751
		Ccr-8266_c0_g1_i1	Metalloprotease (Nematocyte expressed protein 6)	Acropora digitifera	adi_v1.17845
		Ccr-8266_c0_g1_i2	Metalloprotease (Nematocyte expressed protein 6)	Acropora digitifera	adi_v1.17845
		Ccr-20798_c0_g2_i1	Metalloprotease	Chrysaora fuscescens	comp10942_c1_seq1
No domains	21	Ccr-16719_c0_g2_i1	Venom allergen	Chrysaora fuscescens	comp13672_c0_seq1
		Ccr-18496_c0_g1_i1	Venom allergen	Chrysaora fuscescens	comp13672_c0_seq1
		Ccr-18995_c0_g2_i1	Venom allergen	Chrysaora fuscescens	comp13672_c0_seq1
		Ccr-20068_c0_g1_i1	Pore-forming toxin	Chrysaora fuscescens	comp12925_c0_seq1
		Ccr-20503_c1_g1_i3	C-type lectin	Chrysaora fuscescens	comp13880_c0_seq1
		Ccr-20503_c1_g3_i1	C-type lectin	Chrysaora fuscescens	comp13880_c0_seq1
		Ccr-21774_c0_g1_i1	Snaclec 7	Acropora digitifera	adi_v1.12298
		Ccr-22147_c7_g1_i7	Glycoside hydrolase	Chrysaora fuscescens	comp13219_c0_seq1
		Ccr-22495_c0_g4_i1	Phospholipase A2 (Conodipine-M)	Acropora digitifera	adi_v1.18628
		Ccr-22495_c0_g5_i2	Phospholipase A2 (Conodipine-M)	Acropora digitifera	adi_v1.18628
		Ccr-23582_c0_g1_i1	C-type lectin	Chrysaora fuscescens	comp13880_c0_seq1
		Ccr-24465_c2_g1_i2	C-type lectin	Chrysaora fuscescens	comp13880_c0_seq1
		Ccr-24465_c2_g1_i3	C-type lectin	Chrysaora fuscescens	comp13880_c0_seq1
		Ccr-24465_c2_g1_i6	C-type lectin	Chrysaora fuscescens	comp13880_c0_seq1
		Ccr-25647_c0_g2_i2	C-type lectin	Chrysaora fuscescens	comp13792_c0_seq2
		Ccr-25694_c0_g1_i4	Venom allergen	Chrysaora fuscescens	comp13791_c0_seq1
		Ccr-26469_c1_g2_i10	Metalloprotease	Chrysaora fuscescens	comp10942_c1_seq1
		Ccr-29572_c0_g1_i1	Enzyme inhibitor	Chrysaora fuscescens	comp7130_c0_seq1
		Ccr-3025_c0_g1_i1	Pore-forming toxin	Chrysaora fuscescens	comp12925_c0_seq1
		Ccr-36722_c0_g1_i1	Metalloprotease	Chrysaora fuscescens	comp14137_c0_seq1
		Ccr-8523_c0_g1_i1	Venom allergen	Chrysaora fuscescens	comp13791_c0_seq1
Other	62	Ccr-25821_c0_g1_i2	C-type lectin	Chrysaora fuscescens	comp13880_c0_seq1
		Ccr-14907_c0_g1_i1	Venom protein 302	Lychas mucronatus	P0CJ14
		Ccr-14907_c0_g1_i2	Venom protein 302	Lychas mucronatus	P0CJ14
		Ccr-15602_c0_g1_i1	Serine-type endopeptidase (Blarina toxin)	Acropora digitifera	adi_v1.08904
		Ccr-16719_c0_g1_i1	Venom allergen	Chrysaora fuscescens	comp13791_c0_seq1
		Ccr-17057_c0_g1_i1	C-type lectin	Chrysaora fuscescens	comp13880_c0_seq1
		Ccr-17306_c0_g1_i1	C-type lectin	Chrysaora fuscescens	comp13880_c0_seq1
		Ccr-17319_c0_g1_i1	Venom allergen	Chrysaora fuscescens	comp13672_c0_seq1
		Ccr-17319_c0_g1_i2	Venom allergen	Chrysaora fuscescens	comp13791_c0_seq1
		Ccr-17319_c0_g1_i3	Venom allergen	Chrysaora fuscescens	comp13672_c0_seq1
		Ccr-18168_c0_g1_i3	Venom prothrombin activator oscutarin-C non-catalytic subunit	Oxyuranus scutellatus	Q58L91
		Ccr-18343_c0_g1_i2	Coagulation factor X	Acropora digitifera	adi_v1.15821
		Ccr-18727_c0_g1_i1	C-type lectin	Chrysaora fuscescens	comp13880_c0_seq1
		Ccr-18995_c0_g3_i1	Venom allergen	Chrysaora fuscescens	comp13672_c0_seq1
		Ccr-20474_c0_g2_i3	Venom prothrombin activator oscutarin-C non-catalytic subunit	Oxyuranus scutellatus	Q58L91
		Ccr-20816_c0_g1_i1	Metalloprotease (Nematocyte expressed protein 6)	Acropora digitifera	adi_v1.17845
		Ccr-21005_c0_g1_i1	Venom prothrombin activator oscutarin-C non-catalytic subunit	Oxyuranus scutellatus	Q58L91
		Ccr-21271_c0_g1_i2	Venom protein 302	Lychas mucronatus	P0CJ14
		Ccr-21280_c0_g1_i2	C-type lectin	Chrysaora fuscescens	comp13629_c0_seq1
		Ccr-21280_c0_g1_i3	C-type lectin	Chrysaora fuscescens	comp13629_c0_seq1
		Ccr-21280_c0_g1_i5	C-type lectin	Chrysaora fuscescens	comp13629_c0_seq1
		Ccr-21280_c0_g1_i6	C-type lectin	Chrysaora fuscescens	comp13629_c0_seq1
		Ccr-22218_c1_g1_i2	Metalloprotease (Astacin-like toxin)	Acropora digitifera	adi_v1.15751
		Ccr-22218_c1_g1_i3	Metalloprotease (Astacin-like toxin)	Acropora digitifera	adi_v1.15751
		Ccr-22515_c5_g3_i1	C-type lectin	Chrysaora fuscescens	comp13880_c0_seq1
		Ccr-22867_c1_g1_i3	Coagulation factor X	Acropora digitifera	adi_v1.15821
		Ccr-22903_c2_g2_i4	Turripeptide Ici9.1 (Fragment)	Iotyrris cingulifera	P0DKM8
		Ccr-22960_c1_g1_i1	C-type lectin	Chrysaora fuscescens	comp13880_c0_seq1
		Ccr-22960_c1_g1_i2	C-type lectin	Chrysaora fuscescens	comp13880_c0_seq1
		Ccr-22960_c1_g1_i3	C-type lectin	Chrysaora fuscescens	comp13880_c0_seq1
		Ccr-22960_c1_g1_i4	C-type lectin	Chrysaora fuscescens	comp13880_c0_seq1
		Ccr-23582_c0_g1_i3	Venom protein 302	Lychas mucronatus	P0CJ14
		Ccr-24343_c2_g1_i1	C-type lectin	Chrysaora fuscescens	comp13880_c0_seq1
		Ccr-24343_c2_g1_i11	C-type lectin	Chrysaora fuscescens	comp13880_c0_seq1
		Ccr-24343_c2_g1_i4	C-type lectin	Chrysaora fuscescens	comp13880_c0_seq1
		Ccr-24465_c2_g1_i5	C-type lectin	Chrysaora fuscescens	comp13880_c0_seq1
		Ccr-24465_c2_g1_i7	C-type lectin	Chrysaora fuscescens	comp13880_c0_seq1
		Ccr-24635_c0_g1_i4	Venom protein 302	Lychas mucronatus	P0CJ14
		Ccr-24923_c0_g1_i3	Metalloprotease (Astacin-like toxin)	Acropora digitifera	adi_v1.15751
		Ccr-25132_c0_g3_i1	Metalloprotease (Astacin-like toxin)	Acropora digitifera	adi_v1.07444
		Ccr-2533_c0_g1_i1	Venom allergen	Chrysaora fuscescens	comp13672_c0_seq1
		Ccr-25345_c0_g1_i1	C-type lectin	Chrysaora fuscescens	comp13880_c0_seq1
		Ccr-25345_c0_g1_i2	C-type lectin	Chrysaora fuscescens	comp13880_c0_seq1
		Ccr-25345_c0_g1_i3	C-type lectin	Chrysaora fuscescens	comp13880_c0_seq1
		Ccr-25345_c0_g1_i4	C-type lectin	Chrysaora fuscescens	comp13880_c0_seq1
		Ccr-25446_c0_g3_i1	C-type lectin	Chrysaora fuscescens	comp13880_c0_seq1
		Ccr-25471_c1_g1_i1	Metalloprotease (Nematocyte expressed protein 6)	Acropora digitifera	adi_v1.17845
		Ccr-25471_c1_g1_i10	Metalloprotease (Nematocyte expressed protein 6)	Acropora digitifera	adi_v1.17845
		Ccr-25491_c0_g1_i1	Venom allergen	Chrysaora fuscescens	comp13791_c0_seq1
		Ccr-25694_c0_g1_i1	Venom allergen	Chrysaora fuscescens	comp13672_c0_seq1
		Ccr-25825_c2_g2_i1	C-type lectin	Chrysaora fuscescens	comp13880_c0_seq1
		Ccr-26153_c0_g1_i4	Venom allergen	Chrysaora fuscescens	comp13672_c0_seq1
		Ccr-26194_c0_g1_i8	Metalloprotease (Nematocyte expressed protein 6)	Acropora digitifera	adi_v1.13648
		Ccr-26272_c2_g2_i2	C-type lectin	Chrysaora fuscescens	comp13880_c0_seq1
		Ccr-27635_c2_g1_i1	Venom allergen	Chrysaora fuscescens	comp13672_c0_seq1
		Ccr-28221_c1_g2_i7	Kunitz-type serine protease inhibitor	Anthopleura elegantissima	comp55991_c0_seq1(A)
		Ccr-28505_c8_g1_i11	C-type lectin	Chrysaora fuscescens	comp13880_c0_seq1
		Ccr-5950_c0_g1_i1	Venom allergen	Chrysaora fuscescens	comp13672_c0_seq1
		Ccr-20503_c1_g2_i1	C-type lectin	Chrysaora fuscescens	comp13880_c0_seq1
		Ccr-23410_c1_g3_i3	C-type lectin	Chrysaora fuscescens	comp13880_c0_seq1
		Ccr-26310_c2_g2_i1	Venom allergen	Chrysaora fuscescens	comp13672_c0_seq1
		Ccr-25471_c1_g1_i11	Metalloprotease (Nematocyte expressed protein 6)	Acropora digitifera	adi_v1.17845
Phosphodiesterase	19	Ccr-18350_c0_g1_i1	Phosphodiesterase	Acropora digitifera	adi_v1.02125
		Ccr-24068_c6_g2_i1	Phosphodiesterase	Acropora digitifera	adi_v1.16452
		Ccr-24068_c6_g2_i2	Phosphodiesterase	Acropora digitifera	adi_v1.16452
		Ccr-25996_c1_g1_i5	Phosphodiesterase	Acropora digitifera	adi_v1.02125
		Ccr-25996_c1_g1_i7	Phosphodiesterase	Acropora digitifera	adi_v1.02125
		Ccr-25996_c1_g1_i9	Phosphodiesterase	Acropora digitifera	adi_v1.02125
		Ccr-25996_c1_g4_i1	Phosphodiesterase	Acropora digitifera	adi_v1.02125
		Ccr-25996_c1_g4_i2	Phosphodiesterase	Acropora digitifera	adi_v1.02125
		Ccr-25996_c1_g4_i3	Phosphodiesterase	Acropora digitifera	adi_v1.02125
		Ccr-25996_c1_g4_i4	Phosphodiesterase	Acropora digitifera	adi_v1.02125
		Ccr-27169_c0_g2_i1	Phosphodiesterase	Acropora digitifera	adi_v1.02125
		Ccr-27169_c0_g2_i11	Phosphodiesterase	Acropora digitifera	adi_v1.02125
		Ccr-27169_c0_g2_i12	Phosphodiesterase	Acropora digitifera	adi_v1.02125
		Ccr-27169_c0_g2_i3	Phosphodiesterase	Acropora digitifera	adi_v1.02125
		Ccr-27169_c0_g2_i4	Phosphodiesterase	Acropora digitifera	adi_v1.02125
		Ccr-27169_c0_g2_i5	Phosphodiesterase	Acropora digitifera	adi_v1.02125
		Ccr-27169_c0_g2_i6	Phosphodiesterase	Acropora digitifera	adi_v1.02125
		Ccr-28460_c4_g2_i2	Phosphodiesterase	Acropora digitifera	adi_v1.02125
		Ccr-28460_c4_g2_i3	Phosphodiesterase	Acropora digitifera	adi_v1.02125
Phospholipase	12	Ccr-14983_c0_g1_i2	Phospholipase A2 (Conodipine-M)	Acropora digitifera	adi_v1.18628
		Ccr-15440_c0_g1_i1	Basic phospholipase A2 textilotoxin A chain	Pseudonaja textilis	P23026
		Ccr-19608_c0_g1_i2	Phospholipase A2 isozymes PA3A/PA3B/PA5	Heloderma suspectum	P16354
		Ccr-20213_c0_g1_i1	Phospholipase A2 (Conodipine-M)	Acropora digitifera	adi_v1.18628
		Ccr-20299_c0_g1_i3	Phospholipase-B	Acropora digitifera	adi_v1.08969
		Ccr-22006_c0_g1_i2	Phospholipase A2 isozymes PA3A/PA3B/PA5	Heloderma suspectum	P16354
		Ccr-23921_c3_g2_i3	Phospholipase A2 isozymes PA3A/PA3B/PA5	Heloderma suspectum	P16354
		Ccr-27551_c3_g4_i1	Phospholipase-B	Acropora digitifera	adi_v1.08969
		Ccr-27551_c3_g4_i2	Phospholipase-B	Acropora digitifera	adi_v1.08969
		Ccr-27643_c0_g1_i2	Phospholipase A2 (Conodipine-M)	Acropora digitifera	adi_v1.18628
		Ccr-29591_c0_g1_i1	Phospholipase-B	Acropora digitifera	adi_v1.08969
		Ccr-32419_c0_g1_i1	Basic phospholipase A2 textilotoxin A chain	Pseudonaja textilis	P23026
Serine peptidase	29	Ccr-10954_c0_g1_i1	Serine-type endopeptidase (Blarina toxin)	Acropora digitifera	adi_v1.08904
		Ccr-10954_c0_g1_i2	Serine-type endopeptidase (Blarina toxin)	Acropora digitifera	adi_v1.08904
		Ccr-11902_c0_g1_i1	Serine-type endopeptidase (Blarina toxin)	Acropora digitifera	adi_v1.08904
		Ccr-12327_c0_g1_i1	Serine-type endopeptidase (Blarina toxin)	Acropora digitifera	adi_v1.08904
		Ccr-12604_c0_g1_i1	Prothrombin activator (Notecarin)	Acropora digitifera	adi_v1.16374
		Ccr-12604_c0_g1_i2	Prothrombin activator (Notecarin)	Acropora digitifera	adi_v1.16374
		Ccr-16541_c0_g2_i1	Prothrombin activator (Notecarin)	Acropora digitifera	adi_v1.16374
		Ccr-17235_c0_g1_i1	Serine-type endopeptidase (Blarina toxin)	Acropora digitifera	adi_v1.08904
		Ccr-17712_c0_g1_i2	Serine protease	Chrysaora fuscescens	comp13655_c0_seq2
		Ccr-17792_c0_g3_i1	Prothrombin activator (Notecarin)	Acropora digitifera	adi_v1.16374
		Ccr-19022_c0_g1_i1	Prothrombin activator (Notecarin)	Acropora digitifera	adi_v1.16374
		Ccr-19953_c0_g1_i1	Serine-type endopeptidase (Blarina toxin)	Acropora digitifera	adi_v1.08904
		Ccr-19953_c0_g2_i1	Serine-type endopeptidase (Blarina toxin)	Acropora digitifera	adi_v1.08904
		Ccr-21257_c0_g1_i2	Serine type endopeptidase	Acropora digitifera	adi_v1.09733
		Ccr-21895_c0_g1_i2	Prothrombin activator (Notecarin)	Acropora digitifera	adi_v1.16374
		Ccr-21895_c0_g1_i5	Prothrombin activator (Notecarin)	Acropora digitifera	adi_v1.16374
		Ccr-23655_c0_g2_i1	Serine-type endopeptidase (Blarina toxin)	Acropora digitifera	adi_v1.08904
		Ccr-24277_c2_g5_i1	Serine-type endopeptidase (Blarina toxin)	Acropora digitifera	adi_v1.08904
		Ccr-24277_c2_g5_i3	Prothrombin activator (Notecarin)	Acropora digitifera	adi_v1.16374
		Ccr-24844_c0_g2_i1	Serine-type endopeptidase (Blarina toxin)	Acropora digitifera	adi_v1.08904
		Ccr-24844_c0_g2_i6	Serine-type endopeptidase (Blarina toxin)	Acropora digitifera	adi_v1.08904
		Ccr-25236_c0_g1_i1	Enzyme inhibitor	Chrysaora fuscescens	comp7130_c0_seq1
		Ccr-25236_c0_g1_i2	Enzyme inhibitor	Chrysaora fuscescens	comp7130_c0_seq1
		Ccr-26506_c0_g1_i1	Serine protease	Chrysaora fuscescens	comp13655_c0_seq2
		Ccr-26506_c0_g2_i5	Serine protease	Chrysaora fuscescens	comp13655_c0_seq2
		Ccr-30579_c0_g1_i1	Prothrombin activator (Notecarin)	Acropora digitifera	adi_v1.16374
		Ccr-5272_c0_g1_i1	Coagulation factor X	Acropora digitifera	adi_v1.15821
		Ccr-6629_c0_g1_i1	Prothrombin activator (Notecarin)	Acropora digitifera	adi_v1.16374
		Ccr-22867_c1_g1_i1	Coagulation factor X	Acropora digitifera	adi_v1.15821
Serine peptidase inhibitor	5	Ccr-18564_c0_g1_i1	KappaPI-actitoxin-Avd3d	Anemonia sulcata	Q9TWF8
		Ccr-19092_c0_g1_i1	PI-actitoxin-Aeq3b	Actinia equina	P0DMW7
		Ccr-26072_c0_g1_i6	Turripeptide Gsg9.2	Gemmula sogodensis	P0DKT2
		Ccr-26072_c0_g1_i7	Turripeptide Gsg9.2	Gemmula sogodensis	P0DKT2
		Ccr-27719_c1_g2_i1	U-actitoxin-Avd3q	Anemonia viridis	P0DN18
TCTP	1	Ccr-22249_c0_g2_i3	Translationally-controlled tumor protein homolog	Acropora digitifera	adi_v1.01092
Venom complement C3	1	Ccr-27708_c0_g1_i1	A.superbus venom factor 2	Austrelaps superbus	A0RZC6
HAVE MASS SPEC EVIDENCE
ANNOTATED FROM UNIPROT TOXPROT
ANNOTATED FROM Ponce et al., 2016
ANNOTATED FROM Macrander et al., 2015
ANNOTATED FROM Gacesa et al., 2015
