# Supplementary material for: Recruitment of toxin-like proteins with ancestral venom function supports endoparasitic lifestyles of Myxozoa
Source: PeerJ. 2021 Apr 26;9:e11208. doi: 10.7717/peerj.11208 (PMC8083181; doi:10.7717/peerj.11208)
Supplement: Supplemental Information 24 [file peerj-09-11208-s024.xlsx]

## Sheet: Planilha1
	seqs grouping into monophyletic groups including only cnidarians [# groups] , {# seqs in each group}	seqs grouping into monophyletic groups with non cnidarians [# groups] , {related taxon in each group}	# seqs not grouping with any other seq/taxon	seqs could form a unique monophyletic group if polytomy would be resolved? (N/A = non applicable)
Endocnidozoa Myxozoa Buddenbrockia plumatellae - 11 seqs (Bpl)	[2] , {3, 6}	[2] , {myxozoans, 2 spiders}	0	No
Endocnidozoa Other myxozoans - 6 seqs (Myx)	[1] , {2}	[2] , {Bpl , 1 spider}	2	No
Endocnidozoa Polypodiozoa Polypodium hydriforme - 2 seqs (Phy)	0	[2] , {1 scorpion, 1 conid snail}	0	No
Anthozoa - 7 species, 43 seqs	[4] , {21, 5, 4, 13 - plus 1 hydrozoan}	0	0	No*
Staurozoa - 3 species (including Ccr), 5 seqs	[2] , {2, 2}	0	1	Yes
Hydrozoa - 2 species, 2 seqs	[1], {plus 13 anthozoans}	0	1	No
Scyphozoa - 1 species, 1 seq	0	0	1	N/A
* - Anthozoa can not become monophyletic in resolved polytomy, but Cnidaria, including the hydrozoan sequence, can.
